# Supplementary material for: Mechanistic insights into vacancy-driven activation and dissociation of hydrogen peroxide on Ti3C2O2 MXene in water
Source: Royal Society of Chemistry journal article supplement (doi:10.1039/d5na00962f), 2026-04-06

**Figure S1.** The PBE+U optimized structure of the (a) pristine  $\text{Ti}_3\text{C}_2\text{O}_2$  MXene surface, (b) oxygen-deficient  $\text{Ti}_3\text{C}_2\text{O}_2$  surface, showing the bond lengths of the defected surface (the dotted red line indicates the removed O atom from the surface), (c) free  $\text{H}_2\text{O}_2$  molecule, (d) adsorbed  $\text{H}_2\text{O}_2$  on the pristine  $\text{Ti}_3\text{C}_2\text{O}_2$  surface (the inset shows the distortion of the H–O–O–H dihedral angle), and (e) adsorbed/dissociated  $\text{H}_2\text{O}_2$  on the oxygen-deficient  $\text{Ti}_3\text{C}_2\text{O}_2$  surface. Distances are given in angstroms (Å).

**Figure S2.** MLIP–MD equilibration and total energy evolution for  $\text{H}_2\text{O}_2$  adsorption and dissociation on  $\text{Ti}_3\text{C}_2\text{O}_2\text{--O}_{\text{vac}}$ .

(a) Temperature and total energy profiles at 0 K showing rapid convergence and structural stabilization without O–O bond cleavage.

(b) Simulation at 300 K indicating thermal equilibration and a stepwise decrease in total energy associated with  $\text{H}_2\text{O}_2$  activation and dissociation on the defective surface.

(c) Explicit aqueous simulation ( $n\text{H}_2\text{O} + \text{H}_2\text{O}_2$ ) at 300 K demonstrating stable thermal fluctuations and a continuous decrease in total energy, reflecting enhanced reactivity and stabilization of reaction intermediates in water.

Figure S1.

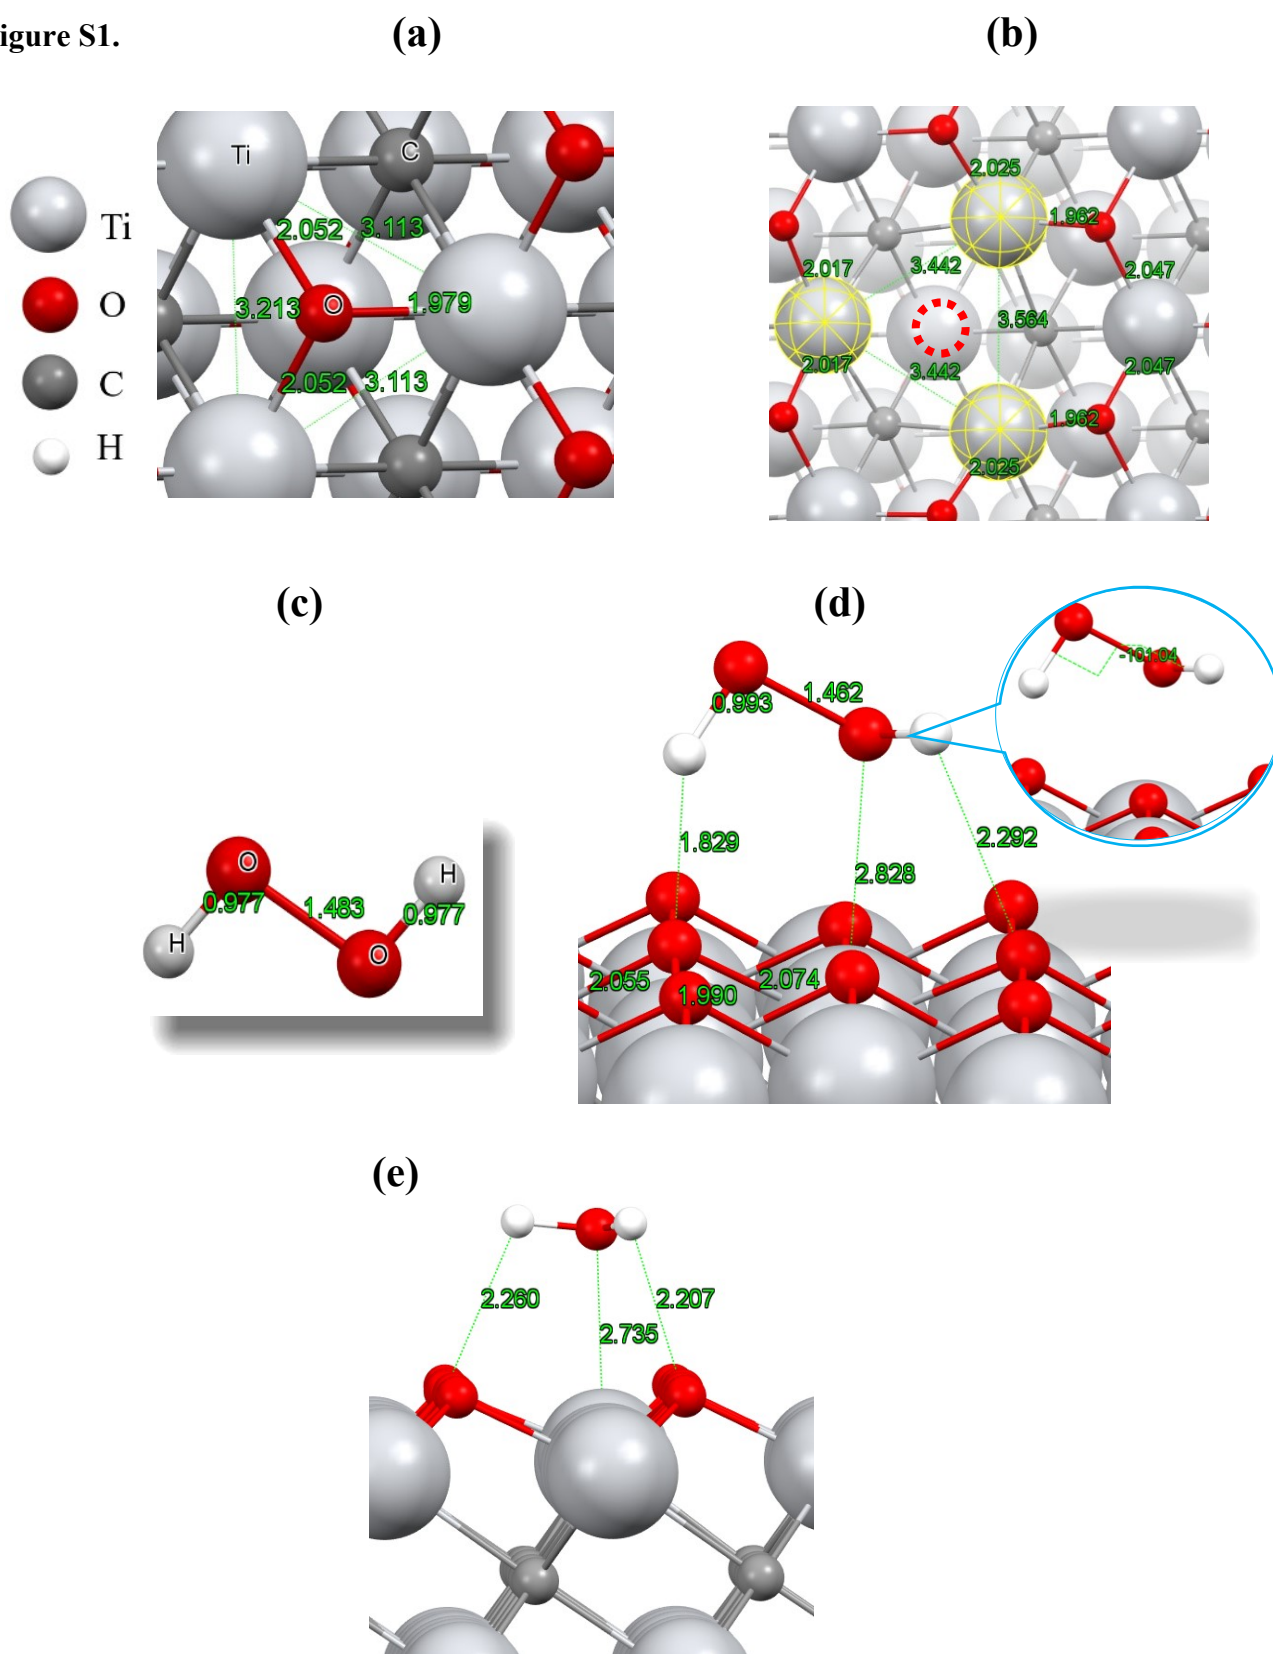

**Figure S2**

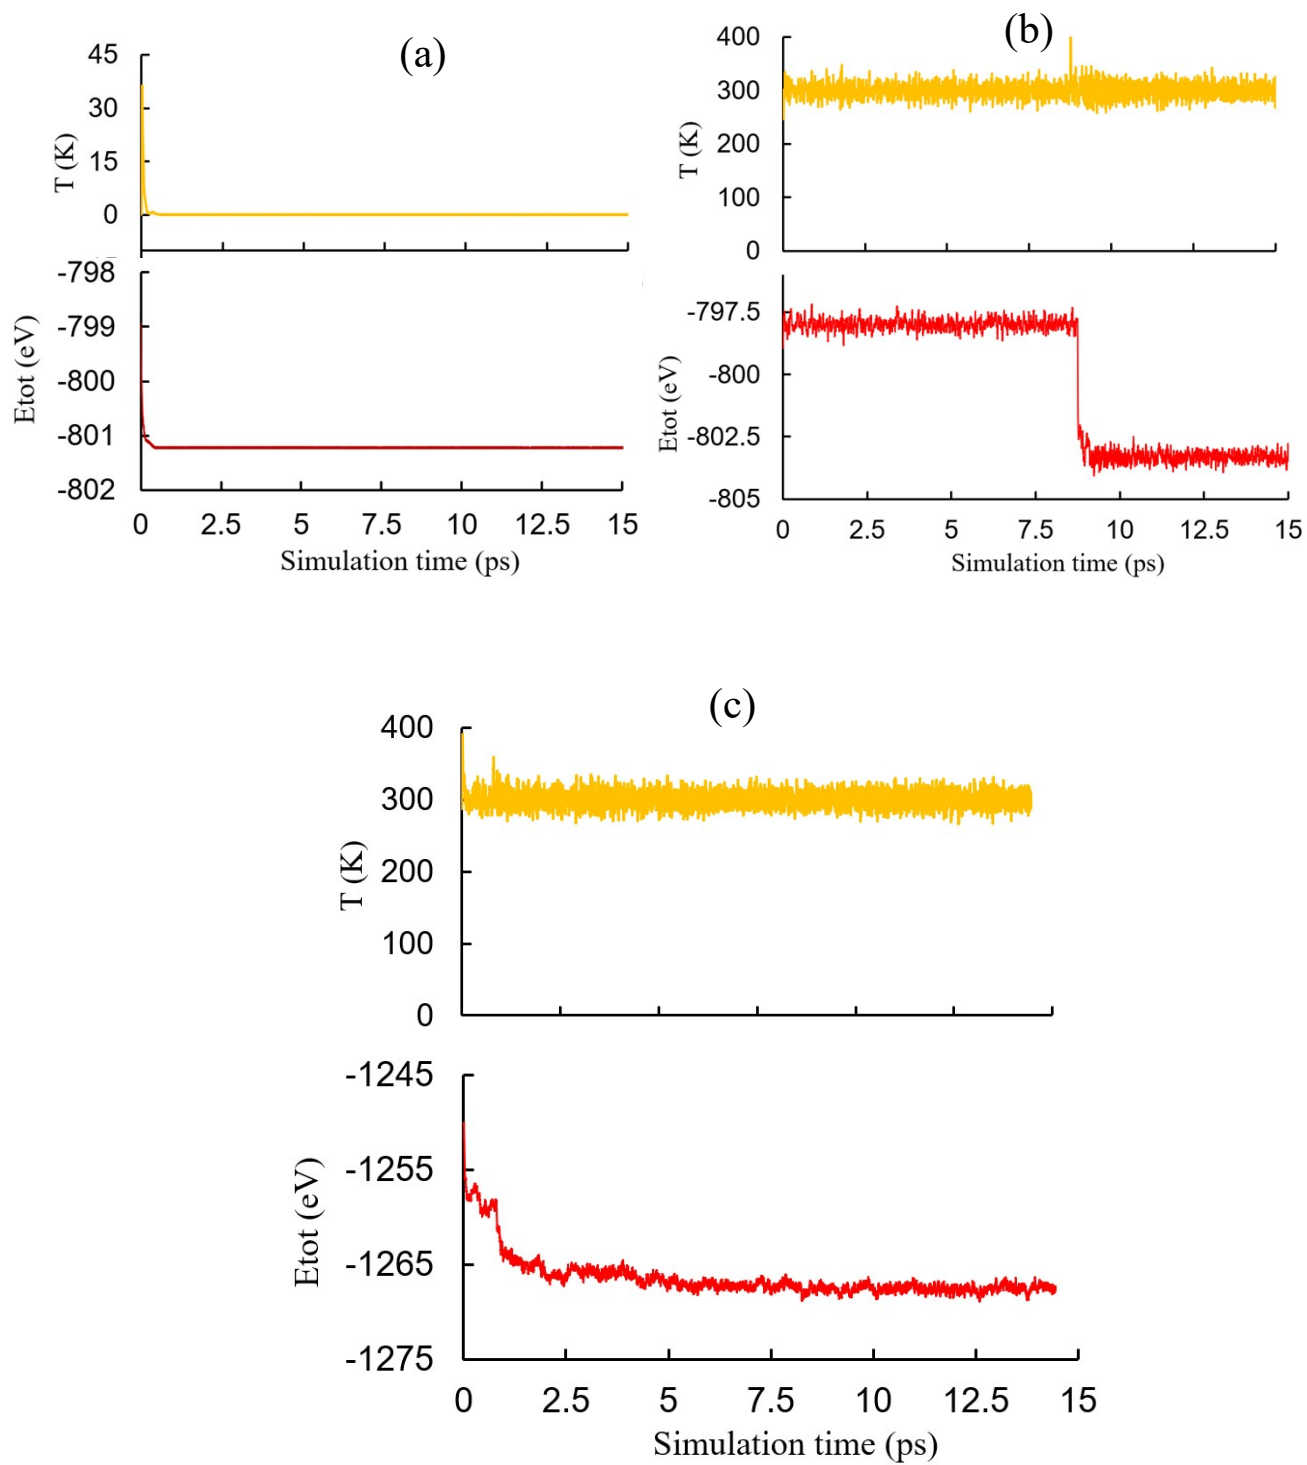

Supplement: d5na00962f1.pdf [file d5na00962f1.pdf]
